# Supplementary material
Source: publisher figshare collection journal article supplement (https://karger.figshare.com/articles/dataset/_/5104498)
Supplement: Supplementary file 1 [file 1]

**Fig. S1.** Alignment of different mammalian fascin 3 proteins. The deduced amino acid sequence of the porcine fascin 3 is shown aligned to that from cow (*Bos taurus*, GenBank accession number XM\_589345), human (*Homo sapiens*, AF281049), rat (*Rattus norvegicus*, NM\_001004232) and mouse (*Mus musculus*, AF176024). The numbers represent the position of the amino acids in the respective protein sequences. Identical amino acid residues in all sequences are indicated by asterisks.

|       |                                                               |     |
|-------|---------------------------------------------------------------|-----|
| Pig   | MDEAEWTPRPARAEDLRVGLISWAGSYLTFETYKNTVTATAKGLGRRQTWEILVSNEHDA  | 60  |
| Cow   | MEEVEWTPRQPRAEDLRVGLISWAGSYLTYEPFKNTVTATAKGLGRRQTWEILVSNEHET  | 60  |
| Human | MDETEWIHRHPKAEDLRVGLISWAGTYLTFEACKNTVTATAKSLGRRQTWEILVSNEHET  | 60  |
| Rat   | MAEVDWIHRHPKAEDLRVGLISWAGTYLTFEAYKSTVTATAKSLGRRQTWELLVSNEHET  | 60  |
| Mouse | MAEVDWIHRHPKAEDLRVGLISWAGTYLTFEAYKSSVTASAKSLGRRQTWELLVSNEHES  | 60  |
|       | * * * * * ** * * * * * * * * * * * * * * * * * * * * * * * *  |     |
| Pig   | QAMVRLRSLQGLYLLCEADGSLCYGRPRTSHHGCFLLRFHRNGKWTLCIISGRYLES DG  | 120 |
| Cow   | QAVVRLRSLQGLYLLCEADGSLCYGRPRTSHHGCFLLRFHRNGQWTLCIISGRYLES DG  | 120 |
| Human | QAVVRLKSVQGLYLLCECDGTVCYGRPRTSHHGCFLLRFHRNSKWTLCIISGRYLES NG  | 120 |
| Rat   | QAVVRLKSLQGLYLLCEADGTVCYGPRTSHHGCFLLRFHRNGKWTLCIISGRYLES DG   | 120 |
| Mouse | QAVIRLKSLQGLYLLCEADGTVCYGRPRTSHHGCFLLRFHRNGKWTLCIISGRYLES DG  | 120 |
|       | ** ** * * * * * * * * * * * * * * * * * * * * * * * * * * * * |     |
| Pig   | EDVFCTSRVLSAYHMTWTPRALHVHVILYSPLNRCYARADPTMGRVWVDAPVPCLEECGF  | 180 |
| Cow   | EDVFCTSRVLSAYHMTWTPRALHVHVILFSPLNHCYARADPTMGRVWVDAPIPCLEECGF  | 180 |
| Human | KDVFCTSHVLSAYHMTWTPRALHVHVILYSPIHRCYARADPTMGRIWVDAAVPCLEECGF  | 180 |
| Rat   | QDVFCSNRVLSAYHMTWTPRALHVHVILYSPTYHSYARADHTVGRVWVDAAVPCLEECGF  | 180 |
| Mouse | EDVFCNSRVLSAYHMTWTPRALHVHVILYSPIYHSYARADHTVGRVWVDAAPPCLEECGF  | 180 |
|       | * * * * * * * * * * * * * * * * * * * * * * * * * * * * * *   |     |
| Pig   | LLHFQDGCYHLETSAHTFLSHLDRLVSQPSTQTAFHMQVRPGGLVALSDGEGGTLYPQGT  | 240 |
| Cow   | LLHFQDGCYHLETSAHTFLSHLDRLVSQPSTQTAFHMQVRPGGLVALSDGEGGMLYPQGT  | 240 |
| Human | LLHFRDGCYHLETSTHHFLSHVDRLFSQPSSQTAFHMQVRPGGLVALCDGEGGMLYPQGT  | 240 |
| Rat   | LLHFQDGCYHLETSTHHFLSRVDRLVPKRSTQTAFHMQVRPRGLVALCDGEGGSLYPQGS  | 240 |
| Mouse | LLHFQDGCYHLETSTHHFLSRVDRLVQRSSQTAFHMQVRPRGLVALCDGEGGTLYPAGS   | 240 |
|       | * * * * * * * * * * * * * * * * * * * * * * * * * * * * * *   |     |
| Pig   | RLLLGLGSSPCGGEWFILQRCPTWVSLRSKTRKFLSIVYDVEVCAASEHITPMSLFQFE   | 300 |
| Cow   | RLLLSLGSNPHGGEWFILQRCPTWVSLTSKARKFLSVIYDVEVCAASEHISPMSLFQFE   | 300 |
| Human | HLLLGMCNPMRGEWFILQHCPTWVSLRSKTGRFISVIYDGEVRAASERLNRMSLFQFE    | 300 |
| Rat   | HLLLGLGSTPMKGEWFVLQHFPAWVSLKSKSRRFLSVIYDAEVCAASERLTQMSLFQYE   | 300 |
| Mouse | HLLLGMSGAPMKGEWFVLQHFPWVSLKSKSRRFLSVIYDAEVCAASERLTQMSLFQYE    | 300 |
|       | * * * * * * * * * * * * * * * * * * * * * * * * * * * * * *   |     |
| Pig   | CNNESPNVQLRSSNGCYLVQRRHRTVMADGHPLESDTFFRMHWNCGRILLQSPNGRFLGI  | 360 |
| Cow   | CDNETPTLQLRSANGCYLAQRRHRAVMADGHPVECECTFFRMHWNCGRILLQSPNGRFLGI | 360 |
| Human | CDSESPTVQLRSANGYYLSQRRHRAVMADGHPLESDTFFRMHWNCGRILLQSCRGRFLGI  | 360 |
| Rat   | CDSESPILQLRSANGFYLAQRRHRAIIADGHPMESDTFFRVHWNCGKITLQSPNGRFLSI  | 360 |
| Mouse | CDSETPTLQLRSANGYYLAQRRHRAIIADGHPMESDTFFRVHWNCGKITLQSPNGRFLGI  | 360 |
|       | * * * * * * * * * * * * * * * * * * * * * * * * * * * * * *   |     |
| Pig   | VANGLLMANATIPGPNEEFGIRLANRPFLALRGRYGYVGTSSSEHDLLQCNMDQPDICHL  | 420 |
| Cow   | AANGLLMASATVPGPNEEFGIRLANRSFLALRGRYGYVGTSSSEHDLLQCNMDQPDICHL  | 420 |
| Human | APNSLLMANVILPGPNEEFGILFANRSFLVLRGRYGYVGSSSGHDLLQCNQDQPDRIHL   | 420 |
| Rat   | ASNGLLMSNVTIPGPNEELGIRFANRPFLVLRGRYGYVGSSSDHDLLKCNMDQPDICQL   | 420 |
| Mouse | ASDGLLMANVTIPGPNEELGIRFANRPFLVLRGRYGYVGSSSDHDLLKCNMDQPDICQL   | 420 |
|       | * * * * * * * * * * * * * * * * * * * * * * * * * * * * * *   |     |
| Pig   | PCRQGIYHFQAQGGSFWSITSFGTFRPWGKFALNFCIELQGSNLLTVLAPNGFYMRSDRS  | 480 |
| Cow   | PCRQGIYHFQAQGGSFWSITSFGTFRPWGKFALNFCIELQGSNLLTVLAPNGFYMRSDRS  | 480 |
| Human | PCRPGIYHFQAQGGSFWSITSFGTFRPWGKFALNFCIELQGSNLLTVLAPNGFYMRADQS  | 480 |
| Rat   | PCHQGIYHFQAQGGSFWSITSFGTFRPWGKFALNFCIELQGSLLTVLAPNGFYLRADRS   | 480 |
| Mouse | PCRQGIYHFQAQGGSFWSITSFGTFRPWGKFALNFCIELQGSLLTVLAPNGFYLRADRS   | 480 |

```

**      *****
Pig      GTLLADSEEDITKECIWEF      498
Cow      GTLLADSEEDITKECIWEF      498
Human    GTLLADSEEDITRECIWEF      498
Rat      GTLLADSEEITKECIWEF      498
Mouse    GTLLADSEEITKECIWEF      498
          ***** ** *****

```
