# Supplementary material
Source: publisher figshare collection journal article supplement (https://karger.figshare.com/articles/dataset/_/5104498)
Supplement: Supplementary file 2 [file 1]

**Table S1.** Genomic organisation of porcine *FSCN3*. Coding sequences are shown in uppercase letters and non coding regions in lowercase letters

| Exon | Exon<br>size<br>(bp) | Intron<br>size<br>(bp) | 3' splice acceptor | 5' splice donor               |
|------|----------------------|------------------------|--------------------|-------------------------------|
| 1    | >245                 | 1022                   | none (5' UTR)      | CGGAGACAGgtaac                |
| 2    | 696                  | 616                    | cccagACCTGGGAA     | ATCGTCTATggcaa                |
| 3    | 117                  | 2629                   | cagatGTTGAGGTG     | CTTGTCCAGgtgag                |
| 4    | 160                  | 467                    | tccagAGGCGCCAT     | CCATTCCAGgtgag                |
| 5    | 171                  | 474                    | ttcagGCCCCAAATG    | ACTTCCAGGgtaag                |
| 6    | 206                  | 1950                   | cccagCACAGGGAG     | GAATTTTAGgtaag                |
| 7    | 173                  | none                   | cccagGTCCTTGGG     | CACAAAAGGCCACCCC <sup>a</sup> |

<sup>a</sup> The 16 bases directly upstream of the poly(A) tail are indicated; the size of the 3' UTR excluding the poly(A) tail is 138 bp.
